# Supplementary material for: Consistent individual differences in haemolymph density reflect risk propensity in a marine invertebrate
Source: PubMed Central journal article supplement (PMC4632539; doi:10.1098/rsos.140482), 2015-06-09
Supplement: rsos140482supp1.pdf [file rsos140482supp1.pdf]

1 **Electronic Supplementary Material S1: Risk propensity in red and green shore**  
 2 **crabs**

3

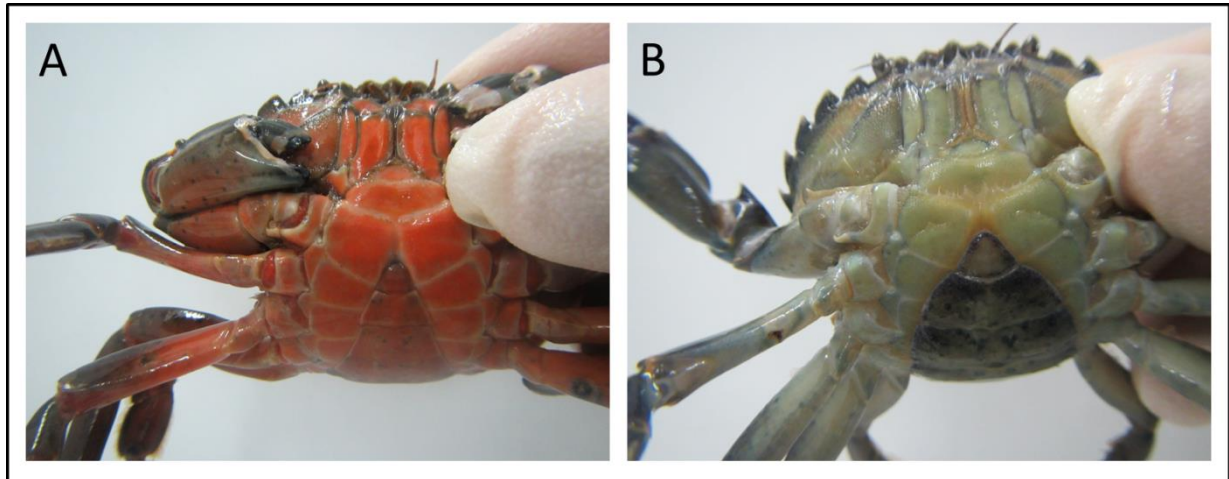

4

5 **Figure S1:** Ventral view of a male “red” (A) and female “green” (B) shore crab (colour  
 6 reflects moulting stage and is independent of sex).

7

8

9 **Table S1:** Factors affecting risk propensity in red and green shore crabs (*Carcinus maenas*).

10

| Model                      | Predictor variable | estimate±SE   | p-value      |
|----------------------------|--------------------|---------------|--------------|
| <i>red crabs</i><br>n=33   | Intercept          | -76.57±36.82  |              |
|                            | Trial              | -1.09±0.71    | 0.137        |
|                            | Sex                | 0.50±1.05     | 0.638        |
|                            | Carapace width     | -0.03±0.08    | 0.652        |
|                            | Haemolymph density | 0.08±0.03     | <b>0.027</b> |
| <i>green crabs</i><br>n=20 | Intercept          | -125.30±42.72 |              |
|                            | Trial              | 0.24±0.77     | 0.758        |
|                            | Sex                | 1.08±0.82     | 0.205        |
|                            | Carapace width     | 0.03±0.06     | 0.641        |
|                            | Haemolymph density | 0.12±0.04     | <b>0.008</b> |

11
